# Supplementary material for: Uncoupling Proteins and Regulated Proton Leak in Mitochondria
Source: Int J Mol Sci. 2022 Jan 28;23(3):1528. doi: 10.3390/ijms23031528 (PMC8835771; doi:10.3390/ijms23031528)
Supplement: Supplementary file 1 [file ijms-23-01528-s001.zip › ijms-1547519-supplementary.pdf]

Supplementary Materials

Proton Leak in Mitochondria

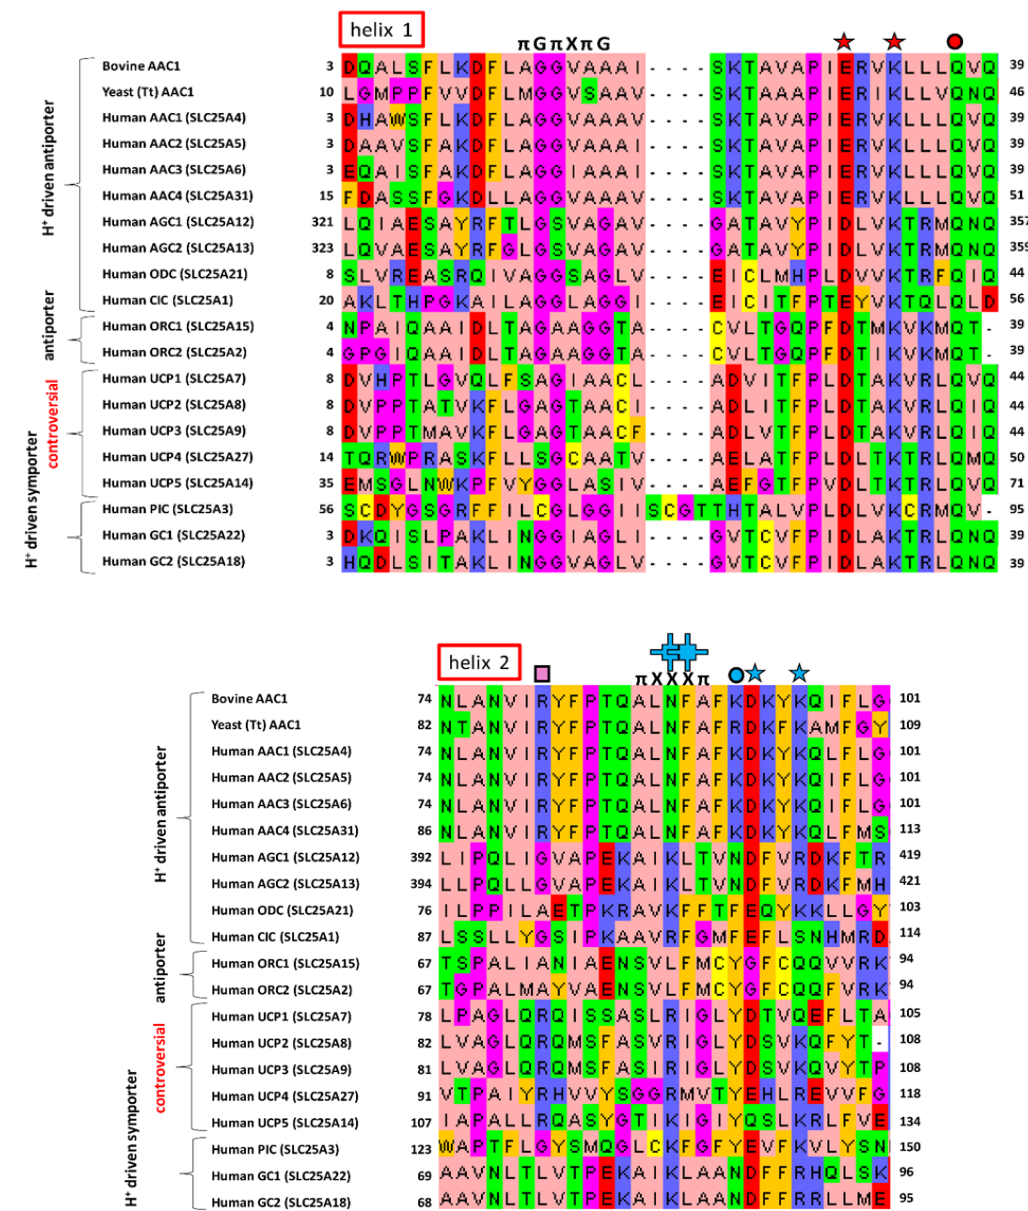

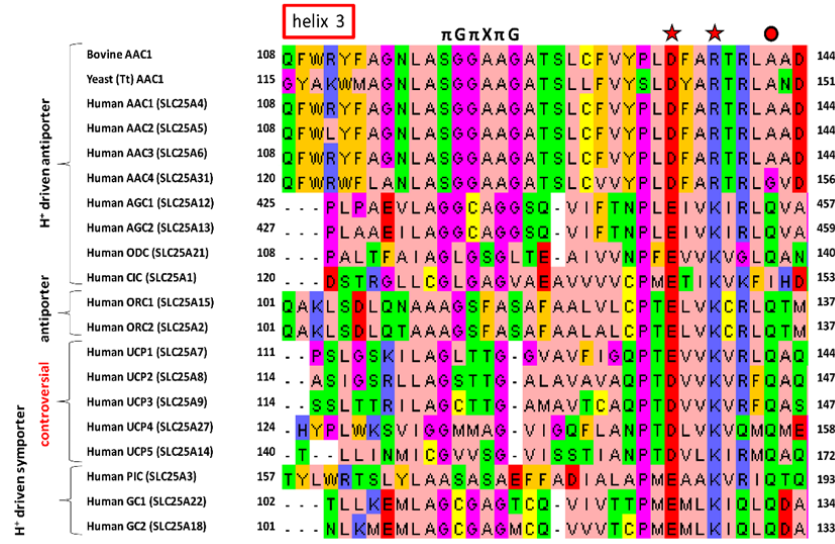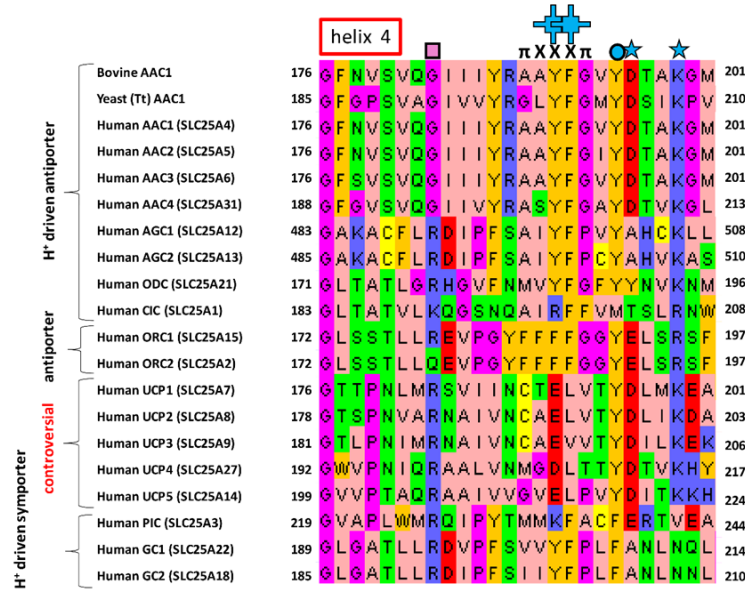

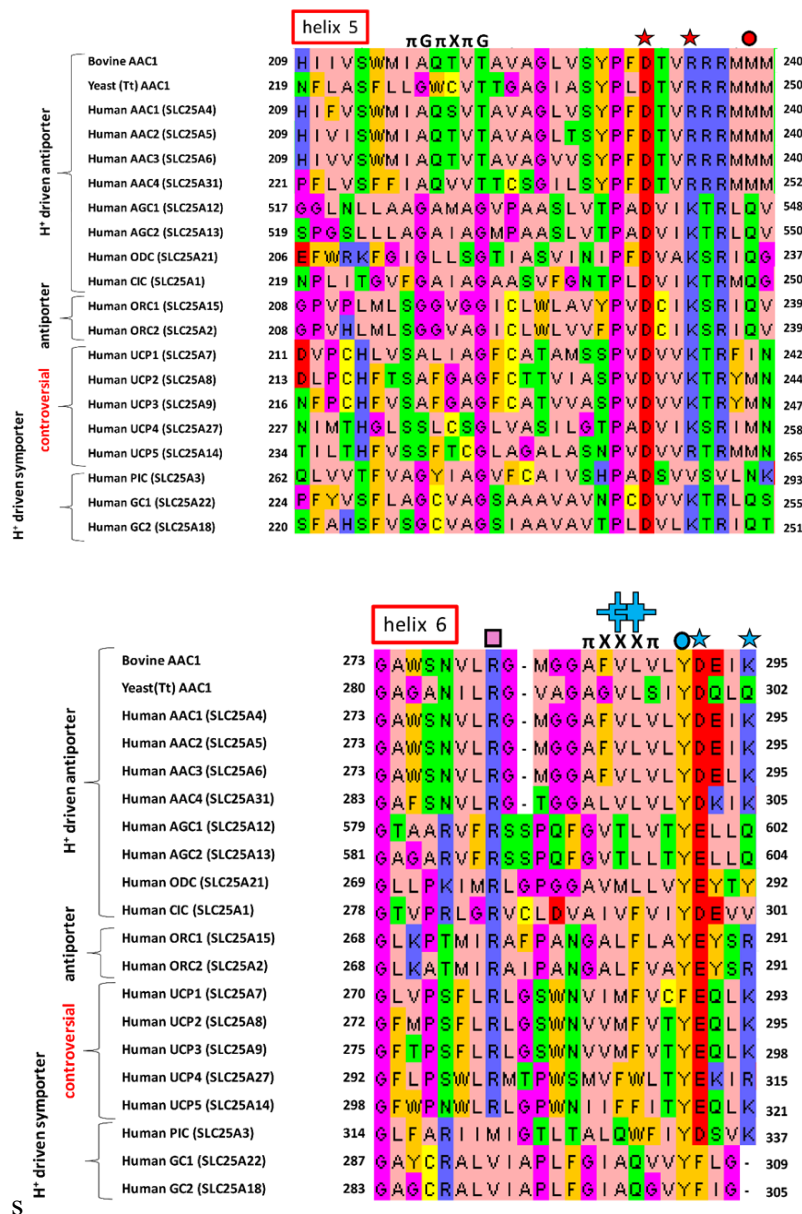

**Figure S1. Sequence alignment of selected proton transporters of the human MCF, with AAC1 from Bovine and yeast.** Alignments were generated using Jalview. Amino acids are color coded as follow: hydrophobic (ILVAM) coral, aromatic (FWY) orange, positive (KHR) blue, negative (DE) red, hydrophilic (STNQ) green, conformationally special (PG) purple and cysteine (C) yellow. Residues involved in the matrix network (red star) and Q-brace (red circle), cytoplasmic network (blue star) and Y-brace (blue circle), bulky residues (blue cross), single binding site (purple square) and the small motifs can be distinguished by their relative signs on top of the columns. AAC: ADP/ATP carrier, AGC: aspartate/glutamate carrier, ODC: oxoadipate carrier, CIC: citrate carrier or tricarboxylate carrier, ORC: ornithine carrier, UCP: uncoupling protein, PIC: phosphate carrier, GC: glutamate carrier. Figure is generated by Jalview 2.11.0.
